# Supplementary material for: Ontogeny, species identity, and environment dominate microbiome dynamics in wild populations of kissing bugs (Triatominae)
Source: PubMed Central journal article supplement (PMC7549230; doi:10.1186/s40168-020-00921-x), 2020-10-11
Supplement: 40168_2020_921_MOESM6_ESM.pdf [file 40168_2020_921_MOESM6_ESM.pdf]

|           | Df  | Sum    | Sq Mean | Sq F value | Pr(>F)        |
|-----------|-----|--------|---------|------------|---------------|
| Groups    | 1   | 0.5625 | 0.56249 | 11.749     | 0.0007677 *** |
| Residuals | 166 | 7.9475 | 0.04788 |            |               |

Signif. codes: 0 '\*\*\*' 0.001 '\*\*' 0.01 '\*' 0.05 '.' 0.1 ' ' 1

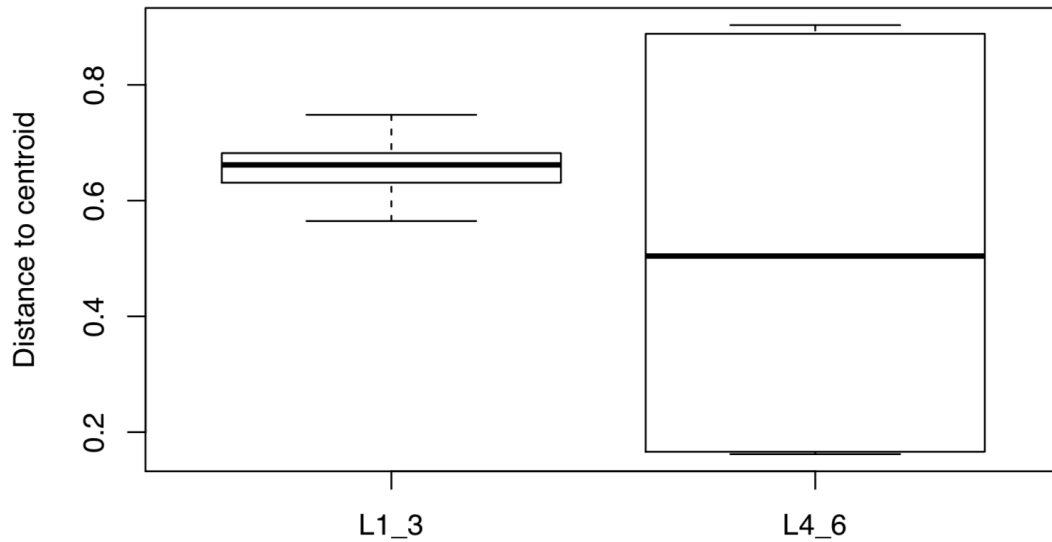

**Additional File 6:** Significant difference in beta dispersion of the instar range groups (L1-L3 and L4-L6) calculated from the *ultraclean* dataset. The beta dispersion analyses were performed with Jaccard index distance matrix using Vegan package (v2.5.6) in R software (v3.6.1).
