# Supplementary material for: Ontogeny, species identity, and environment dominate microbiome dynamics in wild populations of kissing bugs (Triatominae)
Source: PubMed Central journal article supplement (PMC7549230; doi:10.1186/s40168-020-00921-x), 2020-10-11
Supplement: 40168_2020_921_MOESM7_ESM.pdf [file 40168_2020_921_MOESM7_ESM.pdf]

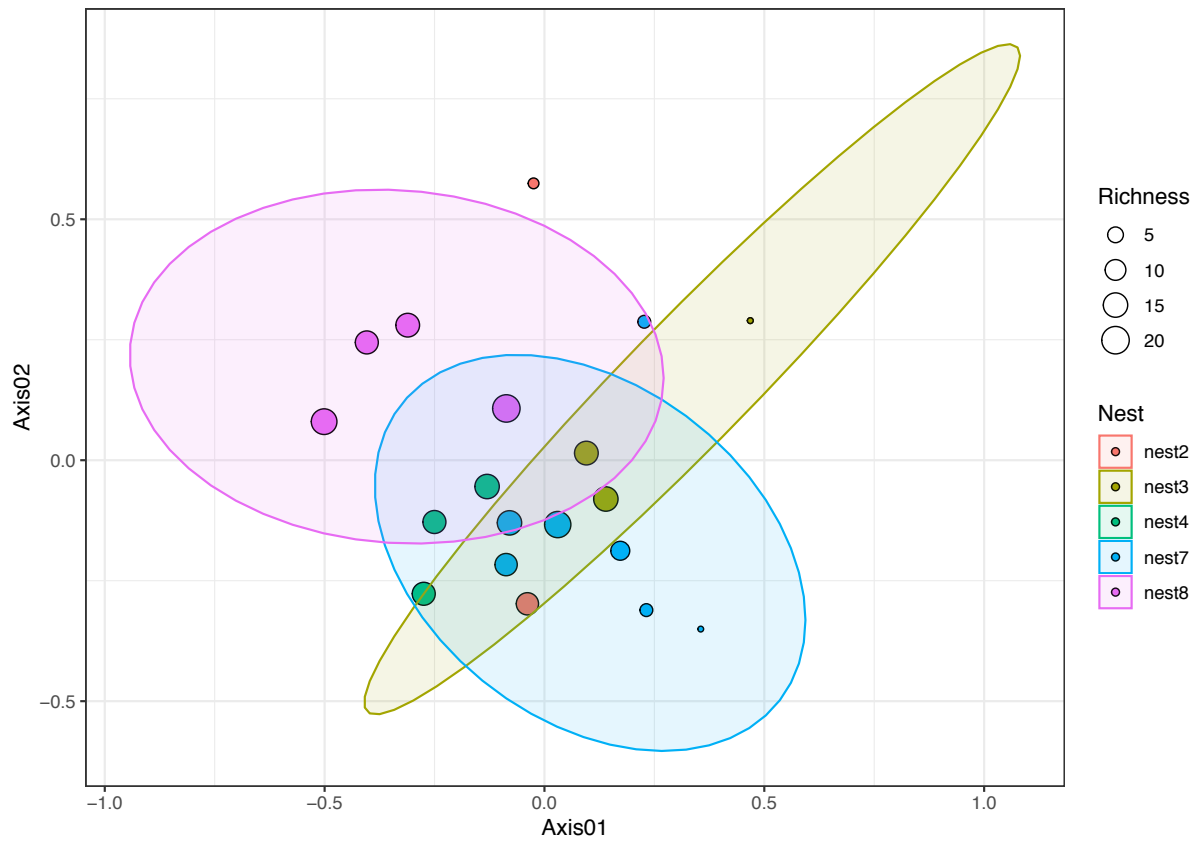

**Additional File 7:** NMDS analyses of *T. rubida* microbiomes from early instar (L1-L3) individuals found in different *N. albigula* nests found at UADS.
