# Supplementary material for: Ontogeny, species identity, and environment dominate microbiome dynamics in wild populations of kissing bugs (Triatominae)
Source: PubMed Central journal article supplement (PMC7549230; doi:10.1186/s40168-020-00921-x), 2020-10-11
Supplement: 40168_2020_921_MOESM8_ESM.pdf [file 40168_2020_921_MOESM8_ESM.pdf]

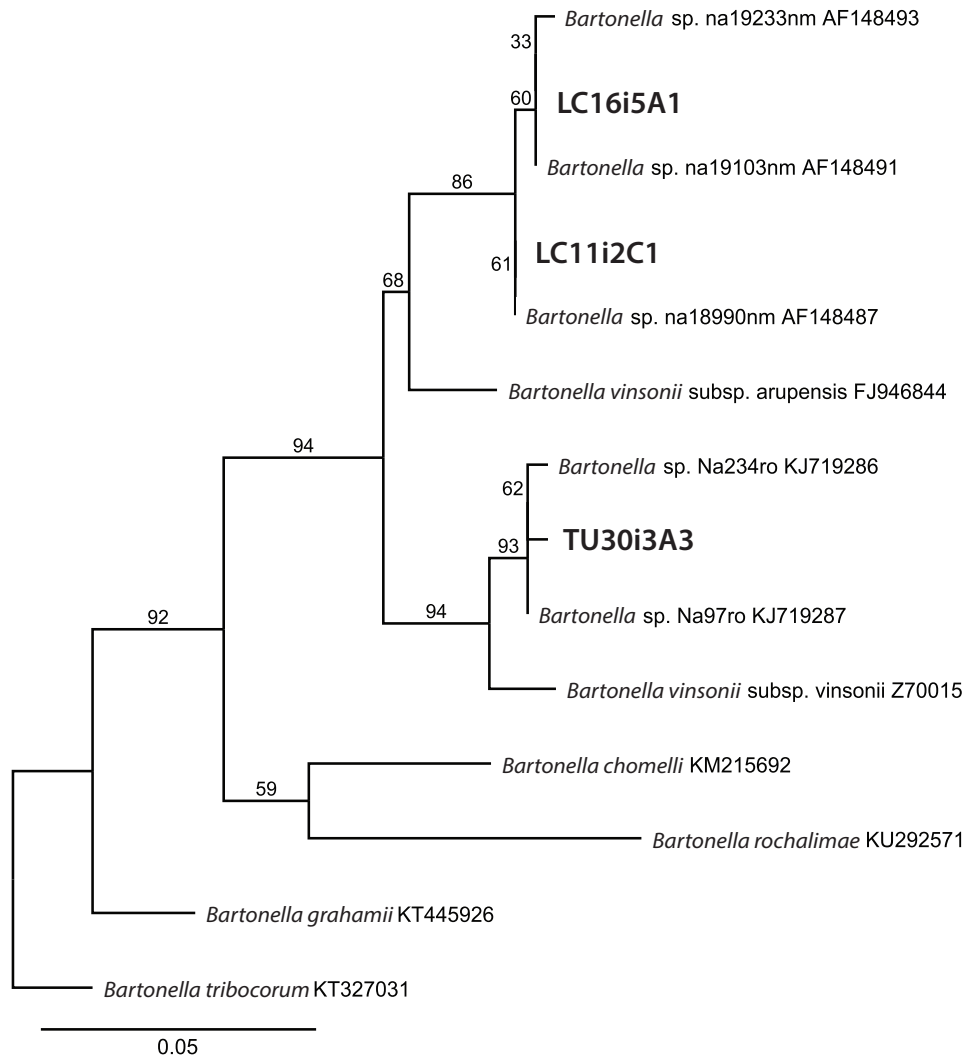

**Additional File 8.** Maximum-likelihood phylogenetic tree for the partial *gItA* sequence of *Bartonella* spp. Designated samples represent 12 (LC16i5A1), 5 (LC11i2C1) and 1 (TU30i3A3) other sequences retrieved from *T. rubida* individuals in this study. The numbers at the nodes designate bootstrap values.
