# Supplementary material for: Ontogeny, species identity, and environment dominate microbiome dynamics in wild populations of kissing bugs (Triatominae)
Source: Microbiome. 2020 Oct 11;8:146. doi: 10.1186/s40168-020-00921-x (PMC7549230; doi:10.1186/s40168-020-00921-x)
Supplement: Supplementary file 5 — Additional File 4: Sample set phylogenetic background inferred from coxB sequences. [file 40168_2020_921_MOESM4_ESM.pdf]

(Rhodnius\_prolixus\_KC543514:0.126801170000000002,('Triatoma  
\_infestans\_MH763648':0.081854869999999991,((LC7i2A2:0.0,((LC5i1D3:0.0,(LC5i1B3:0.0,(LC4i1C0:0.0,(LC4i  
1A0:0.0,(LC33i2C3:0.0,(LC33i2B3:0.0,(LC33i2A3:0.0,(LC2i2E1:0.0,(LC2i2D2:0.0,(LC28i2C2:0.0,(LC28i2B2:0.0,(  
LC28i2A1:0.0,(LC26i6A1:0.0,(LC1i1D0:0.0,(LC1i1C0:0.0,(LC14i4A2:0.0,LC17i6A1:0.0):0.0):0.0):0.0):0.0):  
0.0):0.0):0.0):0.0):0.0):0.0):0.0):0.0):0.0,(((TU38i4A2:0.0,(TU37i4B3:0.0,(TU37i4A3:0.0,(TU36i4B3:  
0.0,(TU2i4A3:0.0033413800000000005,TU36i4A3:0.0):0.0):0.0):0.0):0.0):0.0,(Triatoma\_rubida\_KY305703:0.  
010401959999999988,(TU60i2D2:0.0069101100000000025,(TU60i2C3:0.0,(TU60i2B3:0.0,(TU60i2A3:0.0,TU  
57i3B1:0.0):0.0):0.0):0.0):0.0106683100000000014):0.0068876099999999985):0.0101970800000000025,((T  
U74i4A1:0.0,(TU48i4A1:0.0,TU8i6A0:0.0):0.0):0.0101518199999999978,(TU17i6A0:0.0067152300000000016  
5,(LC1i1B2:0.0,(LC1i1A2:0.0,(TU55i4C1:0.0,((LC2i2C2:0.0,(LC3i3B2:0.0,(LC4i1B0:0.0,(LC7i2B2:0.0,(LC7i2C2:0  
.0,(TU10i6A0:0.0,(TU30i3D3:0.0,(TU30i3F3:0.0,(TU36i4C3:0.0,(LC11i2C1:0.0,(TU39i4B1:0.0,(TU40i3A3:0.0,(  
TU40i3B3:0.0,(TU41i3B2:0.0,(TU47i4A3:0.0,(TU4i3A3:0.0,(TU50i3B3:0.0,(TU54i4A3:0.0,(TU54i4B2:0.0,(TU5  
5i4A1:0.0,(LC11i2D1:0.0,(TU55i4B1:0.0,((TU55i4D1:0.0,(TU65i3A2:0.0,(TU39i4C1:0.00335214000000000035  
,VM5i6A1:0.0):0.0):0.0):0.0,((TU56i3C3:0.0,(TU67i3A2:0.0,(TU1i4A3:0.0033354400000000023,VM1i6A1:0.0)  
:0.0):0.0):0.0,((TU57i3A1:0.0,(TU68i2C2:0.0,(LC13i3B3:0.0,(TU30i3A3:0.0,TU30i3E3:0.0):0.00333583999999  
9979):0.0):0.0):0.0,((TU64i4A2:0.0,(TU68i2D2:0.0,(LC16i5A1:0.0,LC32i5A1:0.0033570900000000007):0.0):0.  
0):0.0,(TU5i4A1:0.0,(LC13i3A3:0.0,(LC14i4B1:0.0,VM2i6A1:0.0033611599999999974):0.0):0.0):0.0):0.0):  
0.0):0.0):0.0):0.0):0.0):0.0):0.0):0.0):0.0):0.0):0.0):0.0):0.0):0.0):0.0):0.0):0.0):0.0):0.0):0.0  
,(LC2i2A2:0.0,LC11i2A1:0.0):0.0):0.0):0.0):0.0):0.0):0.006736799999999987):0.0068780800000000009):  
0.0):0.097445779999999998,(((('Triatoma|\_sanguisuga\_KY305702':0.018246199999999999,(3W07A:0.00601  
509999999999955,(3W08A:0.010262140000000003,(1W06A:0.0032300800000000024,(1L03A:0.0032121600  
0000000194,(2W03A:0.0,(3W05A:0.0,(1L04A:0.0,(4L04A:0.0,(3W09A:0.0,(4L05A:0.0,(1L07A:0.0,(1L08A:0.0,(  
1L09A:0.0,(1L05A:0.0,4L07A:0.0):0.0):0.0):0.0):0.0):0.0):0.0):0.0):0.0):0.0):0.0):0.0):0.0):0.0):0.0):  
9):0.0110714399999999988):0.029484420000000001):0.038071450000000001,(Triatoma\_gerstaeckeri\_JQ282  
723\_Mexico:0.076554110000000001,(2CH22G:0.0,(((2CH24A:0.0,3L02A:0.0):0.0,(4W06A:0.0,(1L02A:0.0,(2  
CH20G:0.0,(2CH55A:0.0,3L01A:0.0):0.0):0.0):0.0):0.0):0.0,(2CH19G:0.0,1L10A:0.0):0.0):0.00438141000000  
003,(1L14A:0.0,((2CH49G:0.0,2CH56A:0.0):0.0,(3L03A:0.0,((2CH48A:0.0,2CH12A:0.0):0.0040094999999999  
99,(2CH11A:0.0033040199999999963,(2CH32G:0.023743500000000003,((2CH37A:0.0,1L06A:0.0):0.0068855  
500000000018,(2CH13A:0.0,(2CH15A:0.0,(2CH08A:0.0168164499999999983,(2CH05A:0.00287369999999999  
79,(4W02A:0.0124237999999999985,(2CH10A:0.0066126300000000008,4W04A:0.031800110000000005):0.0  
):0.0089387699999999985):0.0080637199999999996):0.0057617899999999989):0.0204207600000000038):0.  
00410142999999999615):0.0047760700000000021):0.0074969299999999957):0.0136739099999999956):0.0):  
0.0080497299999999977):0.0):0.0):0.0062821400000000047):0.106154239999999996):0.06776886999999999  
8):0.099920289999999997,(((VM4i6A1:0.0065520000000000002,(LC3i3C2:0.0,Triatoma\_protracta\_JQ28272  
8\_Mexico:0.017509760000000004):0.0):0.00325203000000000724,(TU50i3A3:0.0,(TU53i6A0:0.0,(TU71i5A1:  
0.0,TU49i4A2:0.0):0.0):0.0):0.0032535300000000006):0.0,(LC27i6A1:0.0,(LC19i6A0:0.0,(LC18i6A2:0.0,(TU31i6  
A2:0.0,(LC21i6A1:0.0,(LC9i6A1:0.0,(TU52i6A3:0.0,(LC3i3D2:0.0,(LC3i3A2:0.0,(TU62i3A2:0.0,(TU59i3A3:0.0,(  
TU58i3A1:0.0,(TU66i3A1:0.0,(TU50i3C3:0.0,(TU56i3B3:0.0,(TU49i4B1:0.0,(SP1i4A2:0.0,(LC36i4A1:0.0,(LC23  
i4A3:0.0,(TU35i5A1:0.0,(LC25i5A1:0.0,(LC34i5A1:0.0,(LC24i5A3:0.0,(LC22i5A3:0.0,(TU28i5A1:0.0,(LC2i2B2:0  
.0,(TU69i6A1:0.0065360700000000005,LC20i6A0:0.0):0.0):0.0):0.0):0.0):0.0):0.0):0.0):0.0):0.0):0.0)  
:0.0):0.0):0.0):0.0):0.0):0.0):0.0):0.0):0.0):0.0):0.0):0.0):0.0):0.0):0.0):0.0):0.0):0.0):0.0):0.0)  
:0.16803601,(Triatoma\_lecticularia\_KY  
305716:0.0,(2CH45G:0.0,(2CH42G:0.0,(2CH44G:0.0,(2CH06G:0.0,(2CH07G:0.0,(2CH36G:0.0,(2CH28G:0.0,(2  
CH02G:0.0,(2CH39G:0.0,(2CH43G:0.0,(2CH46A:0.0,(2CH35A:0.0,2CH14A:0.0):0.0):0.0):0.0):0.0):0.0):0.0):  
0):0.0):0.0):0.0):0.0):0.015897889999999997):0.250788210000000007):0.0276901500000000024):0.0482790  
900000000024):0.141631969999999994):0.126801170000000002);
